# Supplementary material for: Influence of calcium on ceramide-1-phosphate monolayers
Source: publisher site journal article supplement (doi:10.3762/bjnano.7.22), 2016-02-12
Supplement: Additional file 1 [file 2190-4286-7-22-S1.pdf]

# **Supporting Information**

for

## **Influence of calcium on ceramide-1-phosphate monolayers**

Joana S. L. Oliveira\*<sup>1</sup>, Gerald Brezesinski<sup>1</sup>, Alexandra Hill<sup>2</sup> and Arne Gericke<sup>2</sup>

Address: <sup>1</sup>Max Planck Institute of Colloids and Interfaces, Colloid Chemistry Department,  
Wissenschaftspark Potsdam-Golm, Am Mühlenberg 1, 14476 Potsdam, Germany and

<sup>2</sup>Department of Biological Sciences, Kent State University, Kent, Ohio 44242, USA

Email: Joana Santos Lapa Oliveira\* - joana.oliveira@mpikg.mpg.de

\* Corresponding author

**Full experimental data**

## 1 Thermodynamic analysis of C1P on pH 9 subphase without calcium

At pH 9 without calcium, C1P undergoes a first-order phase transition from the LE to the LC phase, which can be seen to start at 15 °C. Such transition can be related to the change in area by the two-dimensional Clausius–Clapeyron equation:  $\Delta H_c/T = \Delta S_{Tr} = (\delta\pi_c/\delta T)\cdot\Delta A$ , where  $\Delta H_c$  and  $\Delta S_{Tr}$  are the transition enthalpy and entropy (per molecule), respectively, between two coexisting phases,  $\pi_c$  and  $T$  are the surface pressure and temperature, respectively, at which the phase transition occurs and  $\Delta A$  is the difference in area per molecule between the LE area and the LC area at the transition surface pressure. The transition enthalpy for such system can then be calculated by  $\Delta Q = T\Delta S$ . The values obtained for this system are presented in Table S1.

**Table S1:** Thermodynamic parameters of the analysed system.

| $T$<br>(K) | $\pi_c$<br>(mN/m) | $A_{LC}$<br>(Å <sup>2</sup> /molecule) | $A_{LE}$<br>(Å <sup>2</sup> /molecule) | $A_{LC} - A_{LE}$<br>(Å <sup>2</sup> /molecule) | $\Delta S_{Tr}$<br>(J/mol·K) | $\Delta Q_{Tr}$<br>(kJ/mol) |
|------------|-------------------|----------------------------------------|----------------------------------------|-------------------------------------------------|------------------------------|-----------------------------|
| 293.15     | 6.4               | 48.9                                   | 70.2                                   | -21.3                                           | -148.91                      | -43.65                      |
| 301.15     | 14.1              | 46.8                                   | 58.8                                   | -12                                             | -83.89                       | -25.26                      |
| 303.15     | 18.8              | 45.6                                   | 55                                     | -9.4                                            | -65.71                       | -19.92                      |

The extrapolation of the linear fit of  $\pi_c = f(T)$  towards  $\pi_c = 0$  leads to 14.7 °C. On the other hand, the critical temperature at which it is no longer possible to obtain a LC phase can be determined by extrapolation of the linear fit of  $\Delta Q_{Tr} = f(T)$  towards  $\Delta Q_{Tr} = 0$ , which leads to 38.1 °C.

## 2 Surface pressure–area isotherm of C1P

In Figure S1 the surface pressure–area isotherm of C1P on water at 20°C is presented.

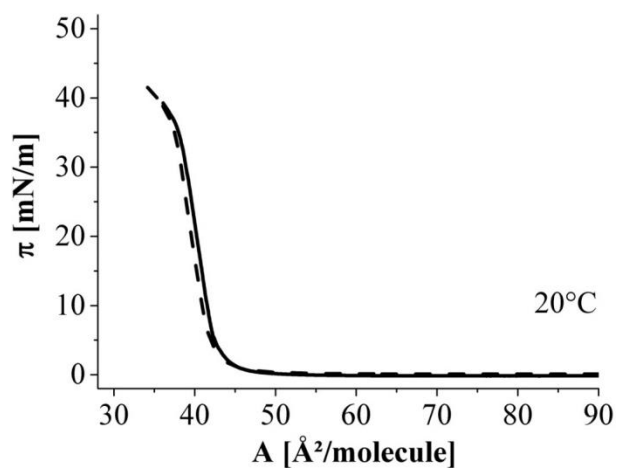

**Figure S1:** Surface pressure–area isotherm of C1P on water at 20°C.

## 3 GIXD measurements

In Tables S2–S6, the GIXD peak positions ( $Q_{xy}$  and  $Q_z$ ) with tilt ( $t$ ), distortion ( $d$ ), cross-sectional area ( $A_0$ ), and in-plane lattice area of a single chain ( $A_{xy}$ ) are given for pH 9 and pH 4 with and without calcium and on water.

**Table S2:** GIXD measurements on water at 20 °C.

| $\pi$<br>(mN/m) | $Q_{xy}^1$<br>( $\text{\AA}^{-1}$ ) | $Q_z^1$<br>( $\text{\AA}^{-1}$ ) | $Q_{xy}^2$<br>( $\text{\AA}^{-1}$ ) | $Q_z^2$<br>( $\text{\AA}^{-1}$ ) | $t$<br>( $^\circ$ ) | $d$    | $A_0$<br>( $\text{\AA}^2$ ) | $A_{xy}$<br>( $\text{\AA}^2$ ) |
|-----------------|-------------------------------------|----------------------------------|-------------------------------------|----------------------------------|---------------------|--------|-----------------------------|--------------------------------|
| 0               | 1.48                                | 0.30                             | 1.50                                | 0.15                             | $11.5 \pm 1$        | 0.0107 | $20.1 \pm 0.4$              | $20.5 \pm 0.4$                 |
| 1               | 1.49                                | 0.24                             | 1.50                                | 0.12                             | $9.3 \pm 1$         | 0.0071 | $20.2 \pm 0.4$              | $20.4 \pm 0.4$                 |
| 5               | 1.50                                | 0                                | 1.50                                | 0.06                             | $2.6 \pm 1$         | 0      | $20.2 \pm 0.4$              | $20.2 \pm 0.4$                 |
| 10              | 1.51                                | 0                                | —                                   | —                                | 0                   | 0      | $20.1 \pm 0.4$              | $20.1 \pm 0.4$                 |
| 20              | 1.52                                | 0                                | —                                   | —                                | 0                   | 0      | $19.8 \pm 0.4$              | $19.8 \pm 0.4$                 |

**Table S3:** GIXD measurements at pH 9 and 20 °C (borax buffer with 150 mM NaCl and 1 mM  $\text{CaCl}_2$ ).

| $\pi$<br>(mN/m) | $Q_{xy}^1$<br>( $\text{\AA}^{-1}$ ) | $Q_z^1$<br>( $\text{\AA}^{-1}$ ) | $Q_{xy}^2$<br>( $\text{\AA}^{-1}$ ) | $Q_z^2$<br>( $\text{\AA}^{-1}$ ) | $Q_{xy}^3$<br>( $\text{\AA}^{-1}$ ) | $Q_z^3$<br>( $\text{\AA}^{-1}$ ) | $t$<br>( $^\circ$ ) | $d$   | $A_0$<br>( $\text{\AA}^2$ ) | $A_{xy}$<br>( $\text{\AA}^2$ ) |
|-----------------|-------------------------------------|----------------------------------|-------------------------------------|----------------------------------|-------------------------------------|----------------------------------|---------------------|-------|-----------------------------|--------------------------------|
| 5               | 1.34                                | 0.51                             | 1.45                                | 0.41                             | 1.59                                | 0.10                             | $22.5 \pm 1$        | 0.197 | $20.1 \pm 0.4$              | $21.7 \pm 0.4$                 |
| 10              | 1.35                                | 0.51                             | 1.45                                | 0.40                             | 1.60                                | 0.10                             | $22.2 \pm 1$        | 0.198 | $20.0 \pm 0.4$              | $21.6 \pm 0.4$                 |
| 20              | 1.36                                | 0.49                             | 1.47                                | 0.37                             | 1.61                                | 0.09                             | $21.2 \pm 1$        | 0.197 | $19.8 \pm 0.4$              | $21.3 \pm 0.4$                 |
| 30              | 1.36                                | 0.47                             | 1.48                                | 0.34                             | 1.61                                | 0.09                             | $19.9 \pm 1$        | 0.194 | $19.7 \pm 0.4$              | $21.0 \pm 0.4$                 |

**Table S4:** GIXD measurements at pH 9 and 20 °C (borax buffer with 150 mM NaCl and 1 mM EDTA).

| $\pi$<br>(mN/m) | $Q_{xy}^1$<br>( $\text{\AA}^{-1}$ ) | $Q_z^1$<br>( $\text{\AA}^{-1}$ ) | $Q_{xy}^2$<br>( $\text{\AA}^{-1}$ ) | $Q_z^2$<br>( $\text{\AA}^{-1}$ ) | $t$<br>( $^\circ$ ) | $d$    | $A_0$<br>( $\text{\AA}^2$ ) | $A_{xy}$<br>( $\text{\AA}^2$ ) |
|-----------------|-------------------------------------|----------------------------------|-------------------------------------|----------------------------------|---------------------|--------|-----------------------------|--------------------------------|
| 15              | 1.40                                | 0.53                             | 1.46                                | 0.27                             | $20.9 \pm 1$        | 0.0615 | $20.5 \pm 0.4$              | $22.0 \pm 0.4$                 |
| 20              | 1.41                                | 0.46                             | 1.47                                | 0.23                             | $17.9 \pm 1$        | 0.0521 | $20.6 \pm 0.4$              | $21.7 \pm 0.4$                 |
| 30              | 1.44                                | 0.37                             | 1.48                                | 0.18                             | $14.3 \pm 1$        | 0.0353 | $20.5 \pm 0.4$              | $21.2 \pm 0.4$                 |
| 35              | 1.47                                | 0.28                             | 1.49                                | 0                                | $12.4 \pm 1$        | 0.0208 | $20.4 \pm 0.4$              | $20.9 \pm 0.4$                 |
| 40              | 1.48                                | 0.24                             | 1.50                                | 0                                | $10.4 \pm 1$        | 0.0153 | $20.3 \pm 0.4$              | $20.7 \pm 0.4$                 |

**Table S5:** GIXD measurements at pH 4 and 20 °C (citric buffer with 150 mM NaCl and 1 mM EDTA).

| $\pi$<br>(mN/m) | $Q_{xy}^1$<br>( $\text{\AA}^{-1}$ ) | $Q_z^1$<br>( $\text{\AA}^{-1}$ ) | $Q_{xy}^2$<br>( $\text{\AA}^{-1}$ ) | $Q_z^2$<br>( $\text{\AA}^{-1}$ ) | $Q_{xy}^3$<br>( $\text{\AA}^{-1}$ ) | $Q_z^3$<br>( $\text{\AA}^{-1}$ ) | $t$<br>( $^\circ$ ) | $d$    | $A_0$<br>( $\text{\AA}^2$ ) | $A_{xy}$<br>( $\text{\AA}^2$ ) |
|-----------------|-------------------------------------|----------------------------------|-------------------------------------|----------------------------------|-------------------------------------|----------------------------------|---------------------|--------|-----------------------------|--------------------------------|
| 5               | 1.42                                | 0.55                             | 1.44                                | 0.39                             | 1.49                                | 0.16                             | $21.8 \pm 1$        | 0.0609 | $20.2 \pm 0.4$              | $21.7 \pm 0.4$                 |
| 10              | 1.45                                | 0.42                             | 1.47                                | 0.29                             | 1.49                                | 0.12                             | $16.6 \pm 1$        | 0.0340 | $20.2 \pm 0.4$              | $21.1 \pm 0.4$                 |
| 20              | —                                   | —                                | 1.48                                | 0.22                             | 1.50                                | 0                                | $9.8 \pm 1$         | 0.0135 | $20.4 \pm 0.4$              | $20.7 \pm 0.4$                 |
| 30              | —                                   | —                                | —                                   | —                                | 1.50                                | 0                                | 0                   | 0      | $20.2 \pm 0.4$              | $20.2 \pm 0.4$                 |

**Table S6:** GIXD measurement at pH 4 and 20 °C (citric buffer with 150 mM NaCl and 1 mM  $\text{CaCl}_2$ ).

| $\pi$<br>(mN/m) | $Q_{xy}^1$<br>( $\text{\AA}^{-1}$ ) | $Q_z^1$<br>( $\text{\AA}^{-1}$ ) | $Q_{xy}^2$<br>( $\text{\AA}^{-1}$ ) | $Q_z^2$<br>( $\text{\AA}^{-1}$ ) | $Q_{xy}^3$<br>( $\text{\AA}^{-1}$ ) | $Q_z^3$<br>( $\text{\AA}^{-1}$ ) | $t$<br>( $^\circ$ ) | $d$    | $A_0$<br>( $\text{\AA}^2$ ) | $A_{xy}$<br>( $\text{\AA}^2$ ) |
|-----------------|-------------------------------------|----------------------------------|-------------------------------------|----------------------------------|-------------------------------------|----------------------------------|---------------------|--------|-----------------------------|--------------------------------|
| 2               | 1.41                                | 0.52                             | 1.44                                | 0.37                             | 1.49                                | 0.15                             | $21.1 \pm 1$        | 0.0711 | $20.4 \pm 0.4$              | $21.9 \pm 0.4$                 |
| 10              | 1.43                                | 0.46                             | 1.45                                | 0.35                             | 1.50                                | 0.10                             | $18.6 \pm 1$        | 0.0536 | $20.4 \pm 0.4$              | $21.5 \pm 0.4$                 |
| 20              | —                                   | —                                | 1.47                                | 0.32                             | 1.50                                | 0                                | $14.4 \pm 1$        | 0.0356 | $20.2 \pm 0.4$              | $20.9 \pm 0.4$                 |
| 30              | —                                   | —                                | 1.48                                | 0.25                             | 1.50                                | 0                                | $11.2 \pm 1$        | 0.0207 | $20.2 \pm 0.4$              | $20.6 \pm 0.4$                 |
| 40              | —                                   | —                                | —                                   | —                                | 1.51                                | 0                                | 0                   | 0      | $20.1 \pm 0.4$              | $20.1 \pm 0.4$                 |
